# Supplementary material for: Circulating Pro- and Anti-Inflammatory Metabolites and Its Potential Role in Rheumatoid Arthritis Pathogenesis
Source: PubMed Central journal article supplement (PMC7226773; doi:10.3390/cells9040827), 2020-03-30
Supplement: cells-09-00827-s001.pdf [file cells-09-00827-s001.pdf]

## Supplementary Materials

### Supplemenatry Table 1. Oxylipin abbreviations and names

| Oxylipin         | Name                                           | Oxylipin         | Name                                 | Oxylipin          | Name                                  |
|------------------|------------------------------------------------|------------------|--------------------------------------|-------------------|---------------------------------------|
| TxB2             | Thromboxane B2                                 | 20 HDoHE         | 20-hydroxy-docosahexaenoic acid      | 12-HETE           | 12-hydroxy-eicosatetraenoic acid      |
| PGF2a            | Prostaglandin F2 alpha                         | LTB4             | Leukotriene B4                       | 12-HEPE           | 12-hydroxy-eicosapentaenoic acid      |
| PGE2             | Prostaglandin E2                               | 5,6-diHETE       | 5,6-dihydroxy-eicosatetraenoic acid  | 14 HDoHE          | 14-hydroxy-docosahexaenoic acid       |
| PGD2             | Prostaglandin D2                               | 5-HETE           | 5-hydroxy-eicosatetraenoic acid      | 11 HDoHE          | 11-hydroxy-docosahexaenoic acid       |
| PGE1             | Prostaglandin E1                               | 5-HEPE           | 5-hydroxy-eicosapentaenoic acid      | 9-HODE            | 9-hydroxy-octadecadienoic acid        |
| PGD1             | Prostaglandin D1                               | 7 HDoHE          | 7-hydroxy-docosahexaenoic acid       | HXB3              | Hepoxilin B3                          |
| PGD3             | Prostaglandin D3                               | 4 HDoHE          | 4-hydroxy-docosahexaenoic acid       | 5-oxoETE          | 5-oxo-eicosatetraenoic acid           |
| 6k PGE1          | 6-keto Prostaglandin E1                        | 9-HOTrE          | 9-hydroxy-octadecatrienoic acid      | 12-oxoETE         | 12-oxo-eicosatetraenoic acid          |
| dh PGF2a         | 13,14-Dihydro-prostaglandin F2alpha            | 5-HETrE          | 5-hydroxy-eicosatrienoic acid        | 15-oxoETE         | 15-oxo-eicosatetraenoic acid          |
| dhk PGF2a        | 13,14-dihydro-15-keto-prostaglandin F2a        | 5,15-diHETE      | 5,15-dihydroxy-eicosatetraenoic acid | 9-oxoODE          | 9-oxo-octadecadienoic acid            |
| dhk PGE2         | 13,14-dihydro-15-keto-prostaglandin E2         | 6R-LXA4          | 6-R Lipoxin A4                       | 13-oxoODE         | 13-oxo-octadecadienoic acid           |
| dhk PGD2         | 13,14-dihydro-15-keto-prostaglandin D2         | 6S-LXA4          | 6-S Lipoxin A4                       | 16-HETE           | 16-hydroxy-eicosatetraenoic acid      |
| bicyclo PGE2     | Bicyclo Prostaglandin E2                       | LXB4             | Lipoxin B4                           | 18-HEPE           | 18-hydroxy-eicosapentaenoic acid      |
| 11b dhk PGF2a    | 11beta 13,14-dihydro-15-keto-prostaglandin F2a | Resolvin E1      | Resolvin E1                          | 5,6-EET           | 5,6-epoxy-eicosatrienoic acid         |
| tetranor-PGFM    | Tetranor-Prostaglandin F Metabolite            | Resolvin D1      | Resolvin D1                          | 8,9-EET           | 8,9-epoxy-eicosatrienoic acid         |
| tetranor 12-HETE | Tetranor 12 hydroxy-eicosatetraenoic acid      | 7,17 dHDPA       | 7,17 dihydroxy-docosapentaenoic acid | 14,15-EET         | 14,15-epoxy-eicosatrienoic acid       |
| 11b PGE2         | 11 beta Prostaglandin E2                       | 15t-Protectin D1 | 15t-Protectin D1                     | 16(17) EpDPE      | 16(17) epoxy-docosapentaenoic acid    |
| 12-HHTrE         | 12-hydroxy-heptadecatrienoic acid              | PDX              | Protectin DX                         | 19,20 DiHDPA      | 19,20 dihydroxy-docosapentaenoic acid |
| 11-HETE          | 11 Hydroxy- eicosatetraenoic acid              | 8,15-diHETE      | 8,15 dihydroxy-eicosatetraenoic acid | 9,10 EpOME        | 9,10-epoxy-octadecenoic acid          |
| 11-HEPE'         | 11-hydroxy-eicosapentaenoic acid               | 15-HETE          | 15-hydroxy-eicosatetraenoic acid     | 12,13 EpOME       | 12,13-epoxy-octadecenoic acid         |
| 13 HDoHE         | 13-hydroxy-docosahexaenoic acid                | 15-HEPE          | 15-hydroxy-eicosapentaenoic acid     | 5,6-diHETrE       | 5,6-dihydroxy-eicosatrienoic acid     |
| PGB2             | Prostaglandin B2                               | 17 HDoHE         | 17-hydroxy-docosahexaenoic acid      | 8,9-diHETrE       | 8,9-dihydroxy-eicosatrienoic acid     |
| PGJ2             | Prostaglandin J2                               | 13-HODE          | 13-hydroxy-octadecadienoic acid      | 14,15-diHETrE     | 14,15-dihydroxy-eicosatrienoic acid   |
| 15d PGD2         | 15-deoxy-Prostaglandin D2                      | 13-HOTrE         | 13-hydroxy-octadecatrienoic acid     | 9,10 diHOME       | 9,10-dihydroxy-octadecenoic acid      |
| 5-iso PGF2a VI   | 5-iso Prostaglandin F2 alpha VI                | 13-HOTrE(y)      | 13-hydroxy-octadecatrienoic acid(y)  | 12,13 diHOME      | 12,13-dihydroxy-octadecenoic acid     |
| 8-iso PGF2a III  | 8-iso Prostaglandin F2 alpha III               | 15-HETrE         | 15-hydroxy-eicosatrienoic acid       | Free AA           | Free Arachidonic Acid                 |
| 9-HETE           | 9-hydroxy-eicosatetraenoic acid                | 8-HETE           | 8-hydroxy-eicosatetraenoic acid      | Free Adrenic Acid | Free Adrenic Acid                     |
| 9-HEPE           | 9-hydroxy-eicosapentaenoic acid                | 8-HEPE           | 8-hydroxy-eicosapentaenoic acid      | Free EPA          | Free Eicosapentaenoic Acid            |
| 8 HDoHE          | 8-hydroxy-docosahexaenoic acid                 | 10 HDoHE         | 10-hydroxy-docosahexaenoic acid      | Free DHA          | Free Docosapentaenoic acid            |
| 16 HDoHE         | 16-hydroxy-docosahexaenoic acid                | 8-HETrE          | 8-hydroxy-eicosatrienoic acid        |                   |                                       |
